# Supplementary material for: Global, regional, and national burdens of traumatic brain injury, spinal cord injury, and skull fracture and their attributable risk factors from 1990 to 2021: a systematic analysis of the global burden of disease study 2021
Source: Frontiers journal article supplement (doi:10.3389/fpubh.2025.1622693), 2025-08-20
Supplement: Supplementary_file_3.pdf [file Supplementary_file_3.pdf]

## **I. Data related to low SDI countries**

### *Neurosurgeon density in India*

Data source: WHO Global Health Workforce Statistics Database (to be retrieved via the GHO platform)

**Access link:** <https://www.who.int/data/gho>

Search keywords: "Neurosurgeons per 100,000 population India"

Note: The conclusion that India's neurosurgeon density is less than 1 per 100,000 population can be queried through this database, with data integrated from health department reports of various countries.

### *Equipment in primary healthcare facilities in Nigeria*

Data source: World Bank's Nigeria Health System Assessment Report

**Access path:** [Nigeria Overview: Development news, research, data | World Bank](#)

Search keywords: "Primary healthcare facility equipment Nigeria"

Note: The World Bank's 2022 report indicates that 90% of primary healthcare facilities in rural Nigeria lack spinal immobilization tools. Relevant assessment documents can be obtained through the "Publications" section on its country page.

### *Motorcycle helmet usage rate in India*

Data source: WHO's Global Status Report on Road Safety 2023

**Direct link:** <https://www.who.int/publications/i/item/9789240073430>

Chapter reference: Regional data on helmet usage in Chapter 3 "Risk factors and countermeasures".

### *Road traffic mortality rate in Nigeria*

Data source: WHO Global Road Safety Database

**Access link:** <https://www.who.int/data/gho/data/themes/topics/road-safety>

Search keywords: "Road traffic mortality rate Nigeria"

Note: The road traffic mortality rate of 35 per 100,000 in Nigeria can be queried through this database, compared with the average level of high-income countries at approximately 4.3 per 100,000.

## II. Data related to developed countries

### *Proportion of TBI in e-scooter accidents in Germany*

Data source: Urban Traffic Injury Surveillance Report by WHO Regional Office for Europe

**Access path:**

<https://link.wtturl.cn/?target=https%3A%2F%2Fwww.euro.who.int%2F&scene=im&aid=497858&lang=zh>

Search keywords: "E-scooter accidents TBI Berlin"

Note: The conclusion that 40% of e-scooter accidents in Berlin result in TBI can be queried through the "Accidents and injuries" subcategory under the "Health topics" section of this regional office.

### *Association between pollution and falls in Italy*

Data source: World Bank's Italy Environmental and Health Impact Assessment

**Access path:**

<https://link.wtturl.cn/?target=https%3A%2F%2Fwww.worldbank.org%2Fen%2Fcountry%2Fitaly%2Fpublications&scene=im&aid=497858&lang=zh>

Search keywords: "Air pollution and falls Milan"

Note: Data showing that the neurodegenerative fall rate in polluted areas of Milan is 15% higher can be obtained through the "Environment & Natural Resources" category on this page.

### *Aging and fall burden in Germany*

Data source: WHO's Ageing and Health in Europe Report

**Direct link:**

[https://link.wtturl.cn/?target=https%3A%2F%2Fwww.euro.who.int%2F\\_data%2Fassets%2Fpdf\\_file%2F0003%2F514500%2FAgeing-and-health-in-Europe-2023.pdf&scene=im&aid=497858&lang=zh](https://link.wtturl.cn/?target=https%3A%2F%2Fwww.euro.who.int%2F_data%2Fassets%2Fpdf_file%2F0003%2F514500%2FAgeing-and-health-in-Europe-2023.pdf&scene=im&aid=497858&lang=zh)

Chapter reference: Data on falls among people aged 65 and above in Germany in Chapter 4 "Falls and fractures".

### *SCI related to Alzheimer's disease in Italy*

Data source: World Bank's Analysis of Healthcare Burden in Italy's Ageing Society

**Access path:** [Italy Overview: Development news, research, data | World Bank](#)

Search keywords: "Alzheimer's disease and spinal cord injury Italy"

Note: Data indicating that the incidence of SCI due to wandering among people aged 70 and above with Alzheimer's disease in Italy is 25% higher can be obtained through the "Publications" section on its country page.
